# Supplementary material for: A comparative study of edge-selective and face-specific growth of PdAg alloys on au nanoplates and their applications for the ethanol oxidation reaction
Source: Royal Society of Chemistry journal article supplement (doi:10.1039/d4ce01165a), 2025-01-01
Supplement: d4ce01165a1.pdf [file d4ce01165a1.pdf]

Supporting Information

## **A Comparative Study of Edge-Selective and Face-Specific Growth of PdAg Alloys on Au Nanoplates and Their Applications for Ethanol Oxidation Reaction**

Yanpei An,<sup>a</sup> Yingying Wang,<sup>b\*</sup> Yuanyuan Min,<sup>c</sup> Xiaoyi Guo,<sup>c</sup> Yanyun Ma,<sup>d</sup> Xian-Sen Tao,<sup>c,e</sup>  
Xianhong Li,<sup>e</sup> and Yiqun Zheng<sup>c\*</sup>

<sup>a</sup> School of Resource & Environment and Safety Engineering, Jining University, Qufu, Shandong 273155, China

<sup>b</sup> Health Management Department, Shandong Vocational College of Light Industry, Zibo, Shandong 255300, China.

<sup>c</sup> School of Chemistry, Chemical Engineering, and Materials, Jining University, Qufu, Shandong 273155, China

<sup>d</sup> Institute of Functional Nano & Soft Materials (FUNSOM), Jiangsu Key Laboratory of Advanced Negative Carbon Technologies, Soochow University, Suzhou 215123 Jiangsu, China

<sup>e</sup> Shandong Sacred Sun Power Sources Co., Ltd

\* Corresponding authors: Prof. Dr. Y. Zheng, E-mail: [yzheng@jnxu.edu.cn](mailto:yzheng@jnxu.edu.cn); Prof. Dr. Y.-Y. Wang, [hxwyy2005@mail.sdu.edu.cn](mailto:hxwyy2005@mail.sdu.edu.cn).

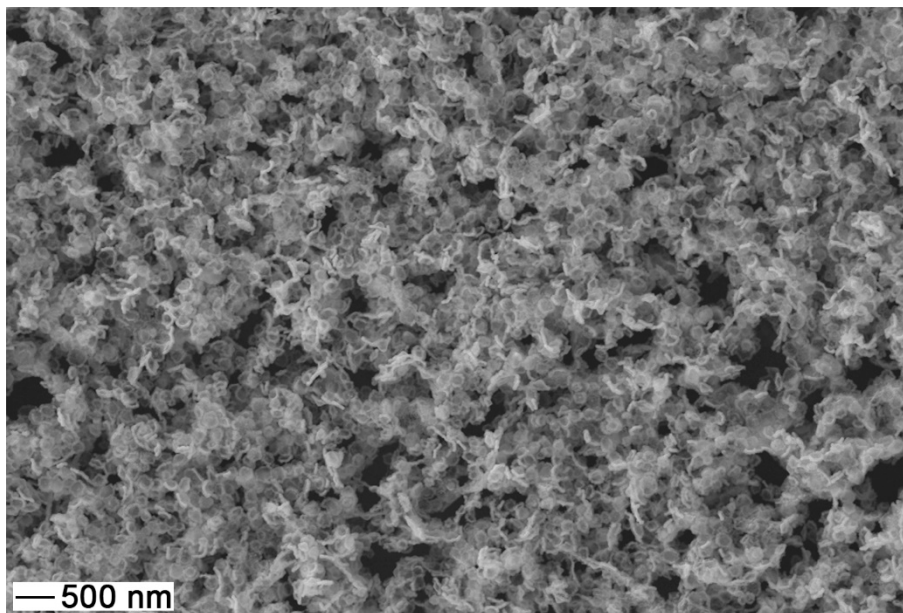

**Figure S1.** Low-magnified SEM image of Au@PdAg in-plane core-shell nanoplates obtained *via* edge-specific growth (Au@PdAg NPs-E).

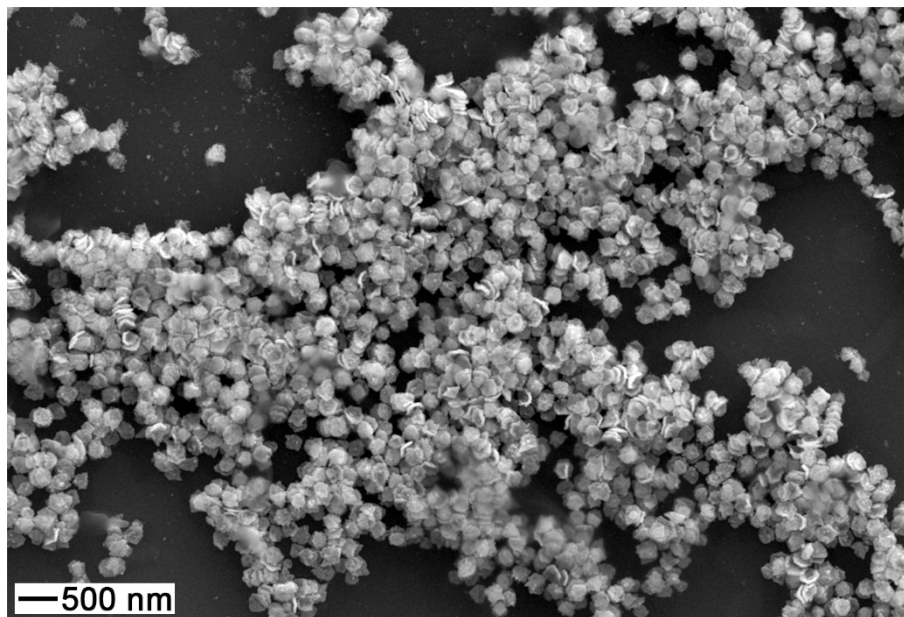

**Figure S2.** Low-magnified SEM image of Au@PdAg core-shell nanoplates obtained *via* face-specific growth (Au@PdAg NPs-F).

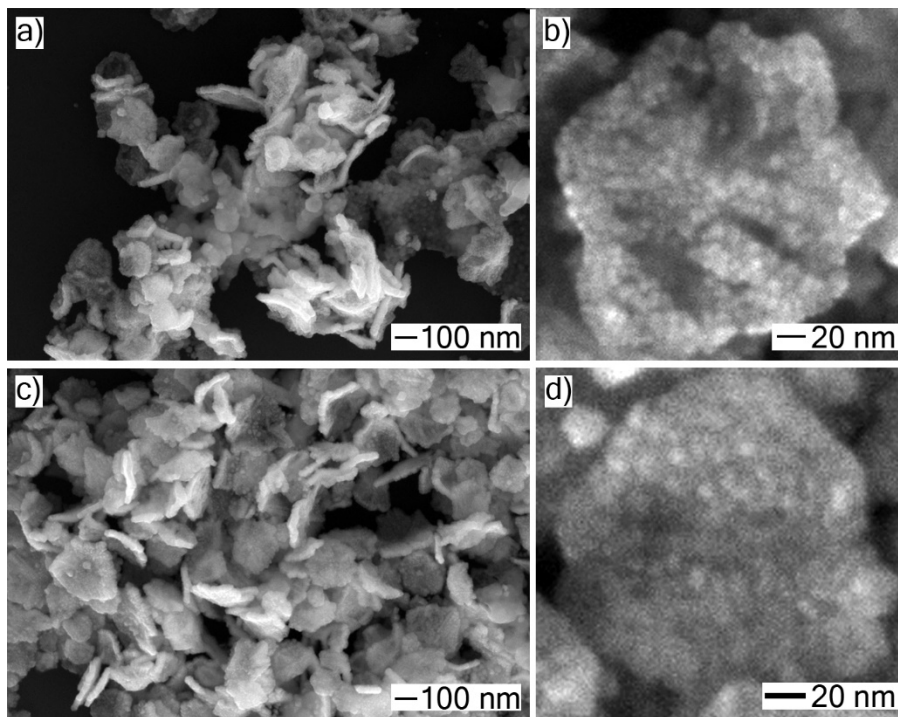

**Figure S3.** SEM images of AuPdAg nanoplates, except that the capping agent was replaced by: a, b) CTAC (200 mM, 1.5 mL)+CTAB (200 mM, 0.5 mL); c, d) CTAC (200 mM, 0.5 mL)+CTAB (200 mM, 1.5 mL), respectively.

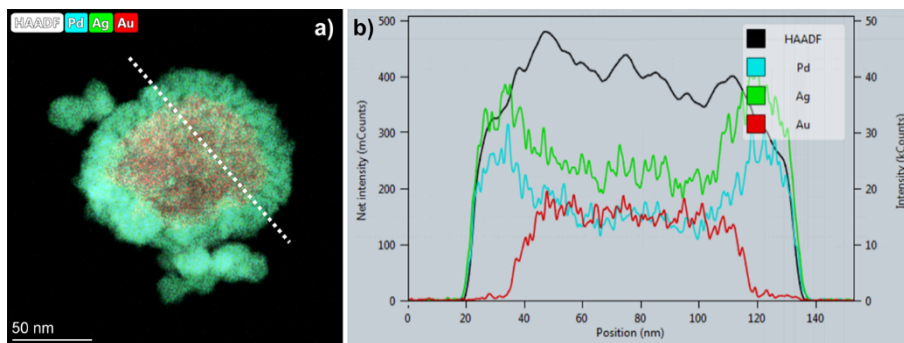

**Figure S4.** a) HAADF-STEM+EDX-STEM image and b) corresponding line-scan profile of a Au@PdAg NP-E.

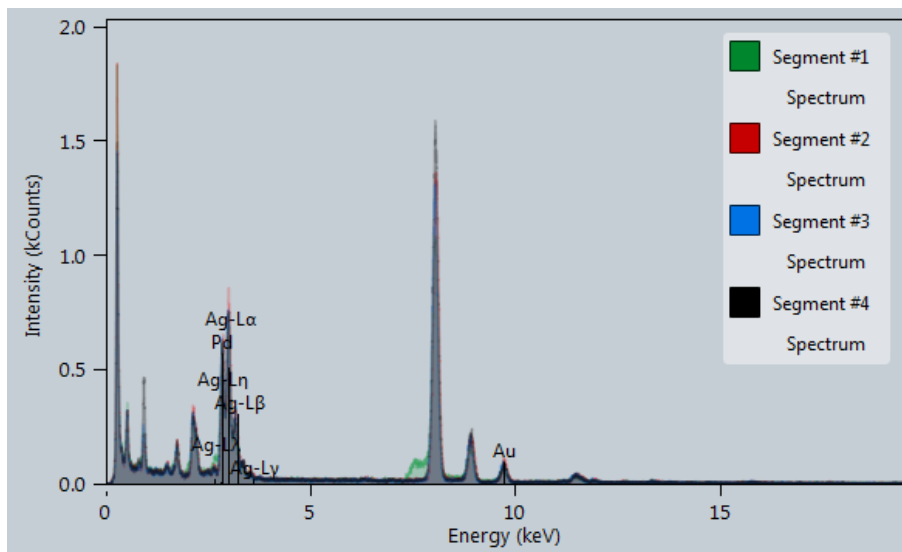

**Figure S5.** EDS spectrum of AuPdAg-E NPs. The molar ratio of Au:Pd:Ag was measured to be 10.7:45.0:44.3.

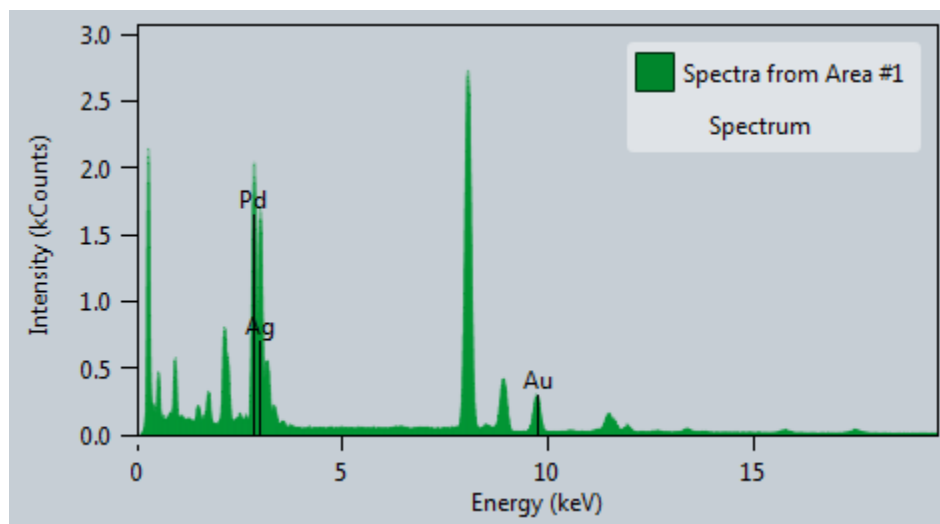

**Figure S6.** EDS spectrum of AuPdAg-F NPs. The molar ratio of Au:Pd:Ag was measured to be 14.1:60.0:25.9.

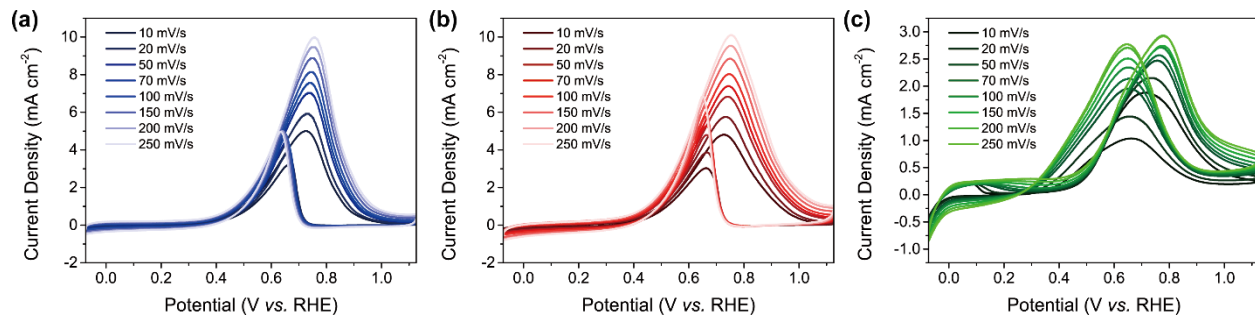

**Figure S7.** CV curves collected in 1 M KOH+1 M ethanol under different scan rates: a) AuPdAg-E NPs/C; b) AuPdAg-F NPs/C; c) Pt/C.



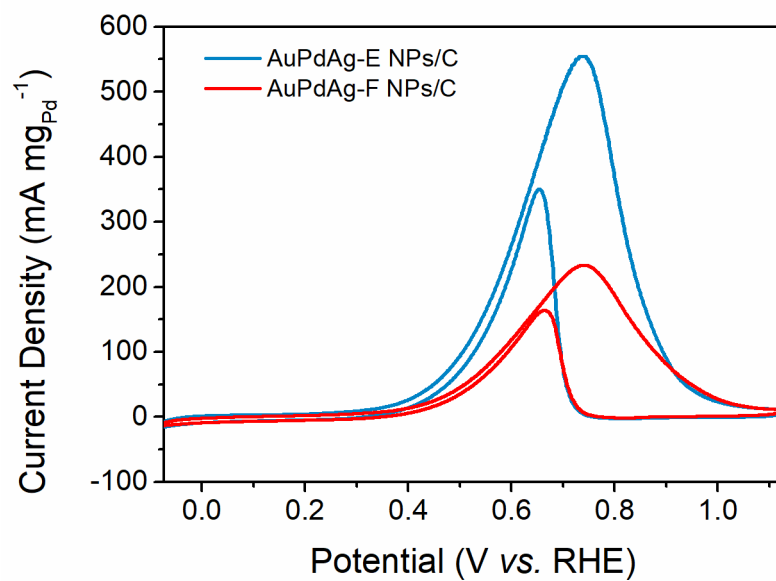

**Figure S8.** The CV curves of AuPdAg-E NPs/C and AuPdAg-F NPs/C with current density based on the mass of palladium in 1 M KOH with 1 M ethanol solution.

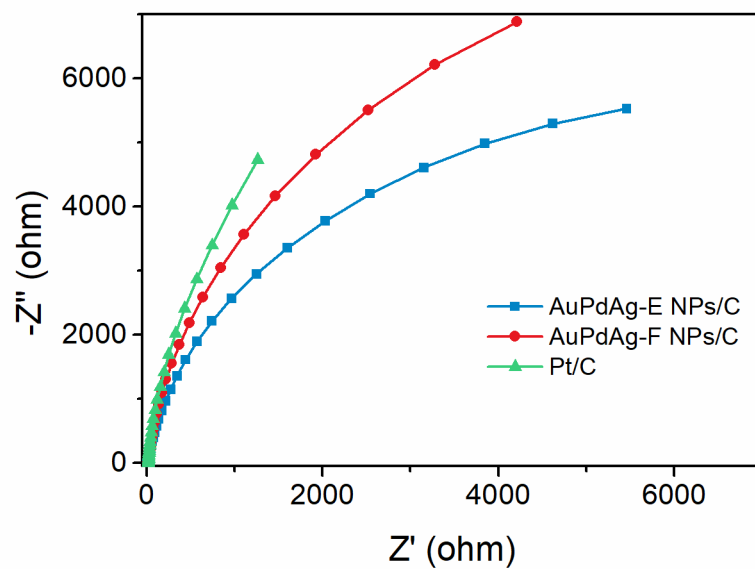

**Figure S9.** Electrochemical impedance spectra of AuPdAg-E NPs/C, AuPdAg-F NPs/C and Pt/C.

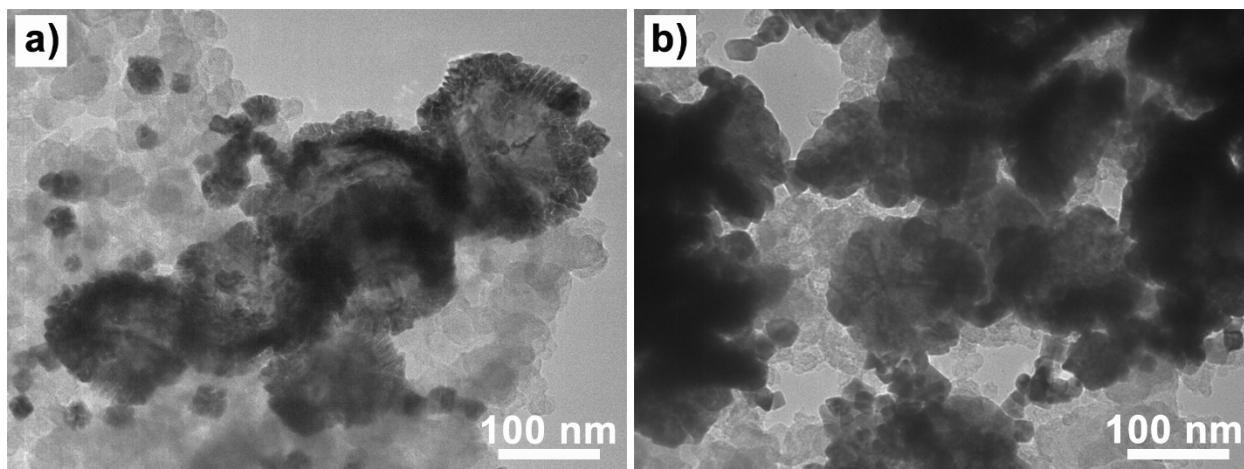

**Figure S10.** TEM images of a) AuPdAg-E NPs/C and b) AuPdAg-F NPs/C after 250 cycles of CV testing.

**Table S1.** XRD results and theoretical diffraction peak positions of as-prepared AuPdAg NPs.

| Sample/Element | Value Type        | Diffraction Peak Position (°) |      |      |      |      |
|----------------|-------------------|-------------------------------|------|------|------|------|
|                |                   | 111                           | 200  | 220  | 311  | 222  |
| AuPdAg-E NPs   | XRD               | 38.9                          | 45.3 | 66.4 | 79.8 | 84.0 |
|                | Theoretical*      | 39.0                          | 45.4 | 66.1 | 79.6 | 83.8 |
| AuPdAg-F NPs   | XRD               | 39.2                          | 45.6 | 66.8 | 80.5 | 85.3 |
|                | Theoretical*      | 39.3                          | 45.8 | 66.6 | 80.3 | 84.6 |
| Au             | JCPDS No. 04-0784 | 38.2                          | 44.4 | 64.6 | 77.5 | 81.7 |
| Pd             | JCPDS No. 46-1043 | 40.1                          | 46.7 | 68.1 | 82.1 | 86.6 |
| Ag             | JCPDS No. 04-0836 | 38.1                          | 44.3 | 64.4 | 77.5 | 81.5 |

\*The theoretical value was calculated using Vegard's Law.

**Table S2.** XPS data of Au@PdAg NPs-E and Au@PdAg NPs-F.

| Sample       | Orbital              | B. E. Peak (eV) | FWHM (eV) | relative peak area | element/oxidation state |
|--------------|----------------------|-----------------|-----------|--------------------|-------------------------|
| AuPdAg-E NPs | Ag 3d <sub>3/2</sub> | 373.3           | 0.8       | 37.0%              | Ag(0)                   |
|              |                      | 374.2           | 1.5       | 4.8%               | Ag(I)                   |
|              | Ag 3d <sub>5/2</sub> | 367.3           | 0.8       | 45.6%              | Ag(0)                   |
|              |                      | 368.3           | 2.3       | 12.6%              | Ag(I)                   |
|              | Pd 3d <sub>3/2</sub> | 339.8           | 0.82      | 16.1%              | Pd(0)                   |
|              |                      | 340.5           | 3.9       | 42.4%              | Pd(II)                  |
|              | Pd 3d <sub>5/2</sub> | 334.5           | 0.78      | 23.8%              | Pd(0)                   |
|              |                      | 335.3           | 2.0       | 17.7%              | Pd(II)                  |
|              | Au 4f <sub>5/2</sub> | 87.3            | 0.78      | 44.0%              | Au(0)                   |
|              |                      | 88.0            | 1.1       | 2.3%               | Au(I)                   |
|              | Au 4f <sub>7/2</sub> | 83.6            | 0.7       | 44.5%              | Au(0)                   |
|              |                      | 85.3            | 2.2       | 9.2%               | Au(I)                   |
| AuPdAg-F NPs | Ag 3d <sub>3/2</sub> | 373.3           | 0.86      | 33.6               | Ag(0)                   |
|              |                      | 374.2           | 1.5       | 6.9                | Ag(I)                   |
|              | Ag 3d <sub>5/2</sub> | 367.3           | 0.89      | 44.4               | Ag(0)                   |
|              |                      | 368.3           | 1.9       | 15.1               | Ag(I)                   |
|              | Pd 3d <sub>3/2</sub> | 339.8           | 0.80      | 17.6               | Pd(0)                   |
|              |                      | 340.6           | 3.4       | 37.8               | Pd(II)                  |
|              | Pd 3d <sub>5/2</sub> | 334.5           | 0.75      | 26.7               | Pd(0)                   |
|              |                      | 335.3           | 1.6       | 17.9               | Pd(II)                  |
|              | Au 4f <sub>5/2</sub> | 87.2            | 0.75      | 22.5               | Au(0)                   |
|              |                      | 88.2            | 0.96      | 7.4                | Au(I)                   |
|              | Au 4f <sub>7/2</sub> | 83.6            | 0.70      | 21.4               | Au(0)                   |
|              |                      | 85.6            | 3.5       | 48.8               | Au(I)                   |

**Table S3.** Summary of EOR performances of electrocatalysts in the present study.

| Electrocatalyst | $E_{\text{Pd-O}}$<br>(V vs. RHE) | $E_s^a$<br>(V vs. RHE) | $E_p^b$<br>(V vs. RHE) | ECSA<br>( $\text{cm}^2 \text{mg}^{-1}$ ) <sup>1)</sup> | $j_r/j_f^b$ | Specific Activity<br>( $\text{mA cm}^{-2}$ ) <sup>b</sup> | $j(t=3000\text{s})$<br>( $\text{mA cm}^{-2}$ ) <sup>2)</sup> |
|-----------------|----------------------------------|------------------------|------------------------|--------------------------------------------------------|-------------|-----------------------------------------------------------|--------------------------------------------------------------|
| AuPdAg-E NPs    | 0.66                             | 0.34                   | 0.74                   | 78.81                                                  | 0.63        | 7.04                                                      | 0.50                                                         |
| AuPdAg-F NPs    | 0.66                             | 0.32                   | 0.74                   | 34.16                                                  | 0.70        | 6.85                                                      | 0.33                                                         |
| Pt/C            | -                                | 0.41                   | 0.76                   | 309.8                                                  | 0.79        | 2.48                                                      | 0.06                                                         |

<sup>a</sup> derived from LSV curve at the scan rate of 10 mV/s;

<sup>b</sup> derived from CV curve at the scan rate of 50 mV/s.
